# Supplementary material
Source: PubMed Central journal article supplement (PMC4312366)
Supplement: 97320630010737S1.pdf [file 97320630010737S1.pdf]

## Supplementary material:

**Table 1:** Inhibitors selected for the study

| S.N | SMO Inhibitors     | PubChem CID  |
|-----|--------------------|--------------|
| 1   | Cyclopamine        | CID 442972   |
| 2   | Saridegib          | CID 25027363 |
| 3   | Itraconazole       | CID 55283    |
| 4   | LDE-225            | CID 24775005 |
| 5   | TAK-441            | CID 44187367 |
| 6   | BMS-833923 (XL139) | CID 57662985 |
| 7   | PF-04449913        | CID 25166913 |

**Table 2:** Docking scores of inhibitors arranged in descending order

| S.No | Inhibitor            | MolDock Score | Rerank Score | HBond Score |
|------|----------------------|---------------|--------------|-------------|
| 1    | BMS 833923 (XL 139 ) | -189.99       | -153.04      | -1.9203     |
| 2    | LDE-225              | -175.82       | -145.9       | -0.2275     |
| 3    | PF-04449913          | -161.97       | -130.7       | -8.3375     |
| 4    | Vismodegib           | -141.46       | -114.6       | -3.7154     |
| 5    | TAK-441              | -189.6        | -92.568      | -3.1279     |
| 6    | Itraconazole         | -189.65       | -71.049      | -2.0268     |
| 7    | Cyclopamine          | -154.45       | -49.784      | -0.4258     |
| 8    | Saridegib            | -133.32       | 15.7613      | -2.0484     |

**Table 3:** Hydrogen bonding profile of BMS 833923 (XL 139) in SMO receptor

| Interacting Residue | Energy<br>Kcal/mol | Length<br>Å |
|---------------------|--------------------|-------------|
| Arg (400)           | -1.078             | 3.38441     |
| Tyr (294)           | -0.4696            | 2.74877     |
| Asn (219)           | -1.3049            | 3.33902     |

**Table 4:** Energy overview of BMS 833923 (XL 139) and its interactions with SMO receptor

| Energy overview: Descriptors       | MolDock Score | Rerank Weight | Rerank Score |
|------------------------------------|---------------|---------------|--------------|
| Total Energy                       | -204.46       |               | -175.04      |
| External Ligand interactions       | -231.09       |               | -199.31      |
| Protein - Ligand interactions      | -231.09       |               | -199.31      |
| Steric (by PLP)                    | -228.24       | 0.686         | -156.57      |
| Steric (by LJ12-6)                 |               | 0.533         | -40.484      |
| Hydrogen bonds                     | -2.852        | 0.792         | -2.259       |
| Hydrogen bonds (no directionality) |               |               | 0            |
| Electrostatic (short range)        | 0             | 0.892         | 0            |
| Electrostatic (long range)         | 0             | 0.156         | 0            |
| Cofactor - Ligand                  | 0             | 0.602         | 0            |
| Water - Ligand interactions        | 0             | 0.988         | 0            |
| Internal Ligand interactions       | 26.627        |               | 24.272       |
| Torsional strain                   | 0.345         | 0.938         | 0.324        |

|                                                      |        |       |        |
|------------------------------------------------------|--------|-------|--------|
| Torsional strain (sp <sup>2</sup> -sp <sup>2</sup> ) |        | 0.636 | 0      |
| Hydrogen bonds                                       |        |       | 0      |
| Steric (by PLP)                                      | 26.282 | 0.172 | 4.52   |
| Steric (by LJ12-6)                                   |        | 0.139 | 19.428 |
| Electrostatic                                        | 0      | 0.437 | 0      |

---
